# Supplementary material
Source: Springer Nature journal article supplement (https://www.springermedizin.de/resource/supplementary/12913_2013_3430_MOESM1_ESM.pdf/9532820)
Supplement: MOESM1 [file 9532820]

## Additional file 1

### Search strategies for principal databases

#### OVID Medline (2000 to January 2012 - updated January 2013)

#### Medline in Process (2000 to January 2012)

- 1 exp Patients/
- 2 \*Practice Guidelines as Topic/
- 3 \*Guidelines as Topic/
- 4 (guideline\* or guidance).tw.
- 5 or/2-4
- 6 exp Communication/
- 7 Comprehension/
- 8 Information Dissemination/mt [Methods]
- 9 Health Knowledge, Attitudes, Practice/
- 10 Attitude to Health/
- 11 Knowledge/
- 12 or/6-11
- 13 1 and 5 and 12
- 14 patient\*.tw.
- 15 (public or "lay person" or "lay people" or citizen\*).tw.
- 16 ("service user\*" or consumer\* or reader\*).tw.
- 17 ("care-giver\*" or "caregiver\*" or carer\*).tw.
- 18 (famil\* or spouse\* or relative\* or partner\* or parent\*).tw.
- 19 or/14-18
- 20 (communicat\* adj3 (guideline\* or guidance)).tw.
- 21 (comprehen\* adj3 (guideline\* or guidance)).tw.
- 22 (present\* adj3 (guideline\* or guidance)).tw.
- 23 (disseminat\* adj3 (guideline\* or guidance)).tw.
- 24 ((understand\* or understood) adj3 (guideline\* or guidance)).tw.
- 25 ((belief\* or believe) adj3 (guideline\* or guidance)).tw.
- 26 (attitude\* adj3 (guideline\* or guidance)).tw.
- 27 (aware\* adj3 (guideline\* or guidance)).tw.
- 28 (knowledge adj3 (guideline\* or guidance)).tw.
- 29 (expect\* adj3 (guideline\* or guidance)).tw.
- 30 ((perception\* or perceive) adj3 (guideline\* or guidance)).tw.
- 31 ((inform or informing) adj3 (guideline\* or guidance)).tw.
- 32 (accept\* adj3 (guideline\* or guidance)).tw.
- 33 or/20-32
- 34 \*Practice Guidelines as Topic/
- 35 \*Guidelines as Topic/
- 36 (guideline\* or guidance).tw.
- 37 34 or 35 or 36
- 38 19 and 33 and 37
- 39 13 or 38
- 40 limit 39 to yr="2000 -Current"
- 41 Animals/
- 42 Humans/
- 43 41 not (41 and 42)
- 44 40 not 43

### **OID ERIC (2000 to January 2012)**

1. exp Patients/
2. exp \*Guidelines/
3. (guideline\* or guidance).tw.
4. 2 or 3
5. exp Communications/
6. exp "communication (thought transfer)"/
7. exp Comprehension/
8. exp information dissemination/
9. exp Knowledge Level/
10. exp Health Education/
11. exp Attitudes/
12. exp Beliefs/
13. exp Expectation/
14. exp Perception/
15. or/5-14
16. 1 and 4 and 15
17. patient\*.tw.
18. (public or "lay person" or "lay people" or citizen\*).tw.
19. ("service user\*" or consumer\* or reader\*).tw.
20. ("care-giver\*" or "care giver\*" or caregiver\* or carer\*).tw.
21. (famil\* or spouse\* or relative\* or partner\* or parent\*).tw.
22. or/17-21
23. (communicat\* adj3 (guideline\* or guidance)).tw.
24. (comprehen\* adj3 (guideline\* or guidance)).tw.
25. (present\* adj3 (guideline\* or guidance)).tw.
26. (disseminat\* adj3 (guideline\* or guidance)).tw.
27. ((understand\* or understood) adj3 (guideline\* or guidance)).tw.
28. (accept\* adj3 (guideline\* or guidance)).tw.
29. ((belief\* or believe) adj3 (guideline\* or guidance)).tw.
30. (attitude\* adj3 (guideline\* or guidance)).tw.
31. (aware\* adj3 (guideline\* or guidance)).tw.
32. (knowledge adj3 (guideline\* or guidance)).tw.
33. (expect\* adj3 (guideline\* or guidance)).tw.
34. ((perception\* or perceive\*) adj3 (guideline\* or guidance)).tw.
35. ((inform\* or informing) adj3 (guideline\* or guidance)).tw.
36. or/23-35
37. exp Guidelines/
38. (guideline\* or guidance).tw.
39. 37 or 38
40. 22 and 36 and 39
41. limit 40 to yr="2000 -Current"

### **EBSCO PsychInfo (2000 to January 2012)**

- S58 S15 or S57 Limiters - Publication Year from: 2000-2012
- S57 S4 and S21 and S56
- S56 S22 or S23 or S24 or S25 or S26 or S27 or S28 or S29 or S30 or S31 or S32 or S33 or S34 or S35 or S36 or S37 or S38 or S39 or S40 or S41 or S42 or S43 or S44 or S45 or S46 or S47 or S48 or S49 or S50 or S51 or S52 or S53 or S54 or S55
- S55 TI informing W3 guidance OR AB informing W3 guidance
- S54 TI informing W3 guideline\* OR AB informing W3 guideline\*
- S53 TI inform\* W3 guidance OR AB inform\* W3 guidance
- S52 TI inform\* W3 guideline\* OR AB inform\* W3 guideline\*
- S51 TI perceive\* W3 guidance OR AB perceive\* W3 guidance

S50 TI perceive\* W3 guideline\* OR AB perceive\* W3 guideline\*  
 S49 TI perception\* W3 guidance OR AB perception\* W3 guidance  
 S48 TI perception\* W3 guideline\* OR AB perception\* W3 guideline\*  
 S47 TI expect\* W3 guidance OR AB expect\* W3 guidance  
 S46 TI expect\* W3 guideline\* OR AB expect\* W3 guideline\*  
 S45 TI knowledge W3 guidance OR AB knowledge W3 guidance  
 S44 TI knowledge W3 guideline\* OR AB knowledge W3 guideline\*  
 S43 TI aware\* W3 guidance OR AB aware\* W3 guidance  
 S42 TI aware\* W3 guideline\* OR AB aware\* W3 guideline\*  
 S41 TI attitude\* W3 guidance OR AB attitude\* W3 guidance  
 S40 TI attitude\* W3 guideline\* OR AB attitude\* W3 guideline\*  
 S39 TI believe W3 guidance OR AB believe W3 guidance  
 S38 TI believe W3 guideline\* OR AB believe W3 guideline\*  
 S37 TI belief\* W3 guidance OR AB belief\* W3 guidance  
 S36 TI belief\* W3 guideline\* OR AB belief\* W3 guideline\*  
 S35 TI understood W3 guidance OR AB understood W3 guidance  
 S34 TI understand\* W3 guidance OR AB understand\* W3 guidance  
 S33 TI understood W3 guideline\* OR AB understood W3 guideline\*  
 S32 TI understand\* W3 guideline\* OR AB understand\* W3 guideline\*  
 S31 TI accept\* W3 guidance OR AB accept\* W3 guidance  
 S30 TI accept\* W3 guideline\* OR AB accept\* W3 guideline\*  
 S29 TI disseminat\* W3 guidance OR AB disseminat\* W3 guidance  
 S28 TI disseminat\* W3 guideline\* OR AB disseminat\* W3 guideline\*  
 S27 TI present\* W3 guidance OR AB present\* W3 guidance  
 S26 TI present\* W3 guideline\* OR AB present\* W3 guideline\*  
 S25 TI comprehen\* W3 guidance OR AB comprehen\* W3 guidance  
 S24 TI comprehen\* W3 guideline\* OR AB comprehen\* W3 guideline\*  
 S23 TI communicat\* W3 guidance OR AB communicat\* W3 guidance  
 S22 TI communicat\* W3 guideline\* OR AB communicat\* W3 guideline\*  
 S21 S16 or S17 or S18 or S19 or S20  
 S20 TI ( famil\* or spouse\* or relative\* or partner\* or parent\* ) OR AB ( famil\* or spouse\* or relative\* or partner\* or parent\* )  
 S19 TI ( "care-giver\*" or "care giver\*" or caregiver\* or carer\* ) OR AB ( "care-giver\*" or "care giver\*" or caregiver\* or carer\* )  
 S18 TI ( "service user" or consumer\* or reader\* ) OR AB ( "service user" or consumer\* or reader\* )  
 S17 TI ( public or "lay person" or "lay people" or citizen\* ) OR AB ( public or "lay person" or "lay people" or citizen\* )  
 S16 TI patient\* OR AB patient\*  
 S15 S1 and S4 and S14  
 S14 S5 or S6 or S7 or S8 or S9 or S10 or S11 or S12 or S13  
 S13 MM "Expectations"  
 S12 MM "Attitudes"  
 S11 MM "Awareness"  
 S10 MM "Consumer Attitudes"  
 S9 MM "Knowledge Level"  
 S8 MM "Health Knowledge"  
 S7 MM "Information Dissemination"  
 S6 MM "Comprehension"  
 S5 MM "Communication"  
 S4 S2 or S3  
 S3 TI ( guideline\* or guidance ) OR AB ( guideline\* or guidance )  
 S2 MM "Treatment Guidelines"  
 S1 MM "Patients"
